# Supplementary material for: Mutual energy transfer luminescent properties in novel CsGd(MoO4)2:Yb3+,Er3+/Ho3+ phosphors for solid-state lighting and solar cells
Source: Royal Society of Chemistry journal article supplement (doi:10.1039/c8cp06538a), 2018-11-27
Supplement: c8cp06538a1.pdf [file c8cp06538a1.pdf]

## Supporting Information

### Mutual energy transfer luminescent properties in novel $\text{CsGd}(\text{MoO}_4)_2:\text{Yb}^{3+}$ , $\text{Er}^{3+}/\text{Ho}^{3+}$ phosphors for solid-state lighting and solar cells

Kai Li\* and Rik Van Deun\*

L<sup>3</sup> – Luminescent Lanthanide Lab, Department of Chemistry, Ghent University, Krijgslaan 281-S3, B-9000 Ghent, Belgium

**Table S1** The ionic radii for  $\text{Cs}^+$ ,  $\text{Gd}^{3+}$  and  $\text{Mo}^{6+}$  ions with respective coordination number CN and corresponding  $D_r$  values for substitutions by  $\text{Yb}^{3+}$  and  $\text{Er}^{3+}/\text{Ho}^{3+}$  ions.

| Ions             | Wyckoff<br>f | Ionic radii (Å), CN = 4 | Ionic radii (Å), CN = 8 | $D_r$ (%) |
|------------------|--------------|-------------------------|-------------------------|-----------|
| $\text{Cs}^+$    | 2f           | ×                       | 1.82                    | ×         |
| $\text{Gd}^{3+}$ | 2e           | ×                       | 1.06                    | ×         |
| $\text{Mo}^{6+}$ | 4g           | 0.65                    | ×                       | ×         |
| $\text{Yb}^{3+}$ | 2e           | ×                       | 0.98                    | 7.5       |
| $\text{Er}^{3+}$ | 2e           | ×                       | 1.00                    | 5.7       |
| $\text{Ho}^{3+}$ | 2e           | ×                       | 1.02                    | 3.8       |

**Table S2** CIE chromaticity coordinates (x, y) for CsGd<sub>0.98-x</sub>(MoO<sub>4</sub>)<sub>2</sub>:xYb<sup>3+</sup>, 0.02Er<sup>3+</sup> and CsGd<sub>0.99-a</sub>(MoO<sub>4</sub>)<sub>2</sub>:aYb<sup>3+</sup>, 0.01Ho<sup>3+</sup> upon 975 nm laser excitation.

| Sample no. | Content (x) | CIE chromaticity coordinate (x, y) | Sample no. | Content (a) | CIE chromaticity coordinate (x,y) |
|------------|-------------|------------------------------------|------------|-------------|-----------------------------------|
| 1          | 0.05        | (0.257, 0.716)                     | 7          | 0.05        | (0.559, 0.429)                    |
| 2          | 0.10        | (0.251, 0.724)                     | 8          | 0.10        | (0.557, 0.434)                    |
| 3          | 0.15        | (0.249, 0.726)                     | 9          | 0.20        | (0.533, 0.459)                    |
| 4          | 0.20        | (0.247, 0.728)                     | 10         | 0.30        | (0.507, 0.484)                    |
| 5          | 0.30        | (0.245, 0.730)                     | 11         | 0.40        | (0.488, 0.502)                    |
| 6          | 0.40        | (0.242, 0.732)                     | 12         | 0.50        | (0.479, 0.511)                    |
